# Supplementary material for: Amorphous NiB/carbon nanohybrids: synthesis and catalytic enhancement induced by electron transfer
Source: Royal Society of Chemistry journal article supplement (doi:10.1039/c6ra19262a), 2016-01-01
Supplement: c6ra19262a1.pdf [file c6ra19262a1.pdf]

## Supporting Information

# Amorphous NiB/Carbon Nanohybrids: Synthesis and Catalytic Enhancement Induced by Electron Transfer

Weikai Liu,<sup>a</sup> Ruifen Chen,<sup>a</sup> Lijun Liu,<sup>\*a</sup> Shuangzhi Li,<sup>a</sup> Zhiyong Xue<sup>\*a</sup> and Chiyang He<sup>a</sup>

<sup>a</sup> College of Chemistry and Chemical Engineering, Wuhan Textile University, Wuhan 430073,  
People's Republic of China

\* To whom correspondence should be addressed.

Lijun Liu: E-mail: eduliu@163.com; Tel: +86-27-59367685

Zhiyong Xue: E-mail: xuezhiyong@wtu.edu.cn; Tel: +86-27-59367685

## Discussion of FTIR results

In this work, we have observed the so-called strong metal-support interaction (SMSI) effect in the NiB/C catalyst, which is manifested by the charge transfer between metal and carbon support. It is suggested oxygen-containing surface groups on carbon supports (e.g., carbon nanotube, graphene) could induce the charge transfer between metal and support.<sup>1</sup> As a result, we have carefully investigated the change of these surface groups on the carbon by FTIR.

The FTIR spectra show the adsorption band of carboxylic C=O group on the carbon is positively shifted after coupling with NiB alloy.

Generally, the vibration frequency of a chemical bond is determined as follows:

$$\nu = \frac{1}{2\pi c} \sqrt{\frac{\kappa}{\mu}} \quad (\text{eq. 1})$$

where  $\nu$  is the vibration frequency,  $\kappa$  is the force constant, and  $\mu$  is the reduced mass,  $\mu = m_1 m_2 / (m_1 + m_2)$ , where  $m_1$  and  $m_2$  are the component masses for the chemical bond.

The vibration frequency will positively shift when the force constant ( $\kappa$ ) of a chemical bond is increased. Therefore, the positive shift of  $\nu(\text{C=O})$  indicates an enhancement of C=O bond strength, which could be caused by the electron transfer from Ni species to oxygen-containing groups due to the electronegative difference between Ni and O element. Such electron transfer can increase the electron density of C=O bonds and lead to a positive shift of  $\nu(\text{C=O})$  as shown in Fig. 4 (see Manuscript). Thus, we believe this could be another fact to prove the strong interaction between NiB and C support.

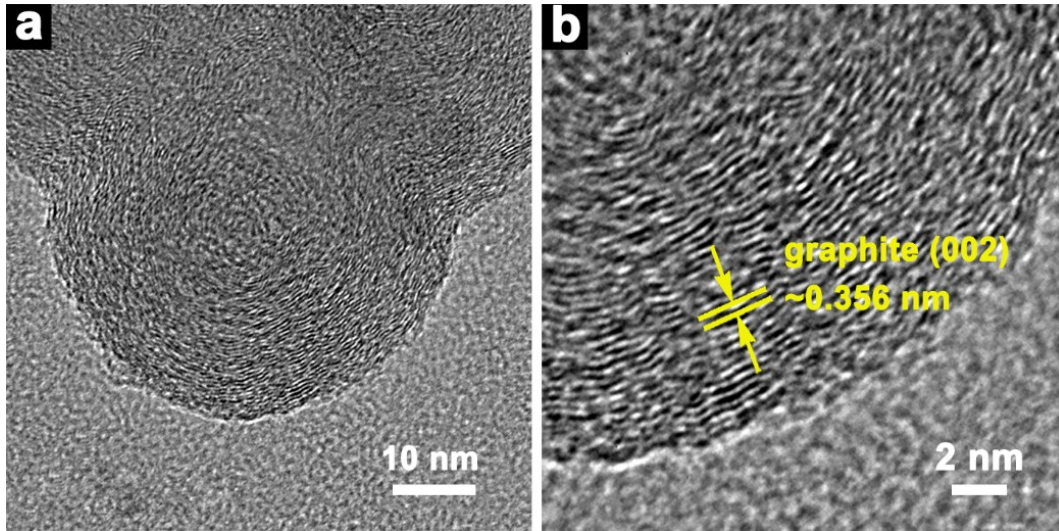

**Fig. S1.** (a) TEM and (B) HRTEM images of the graphite carbon NP. The image clearly shows the slightly-distorted lattice fringes with an interplanar distance of 0.356 nm corresponding to the (002) facets of graphite carbon.

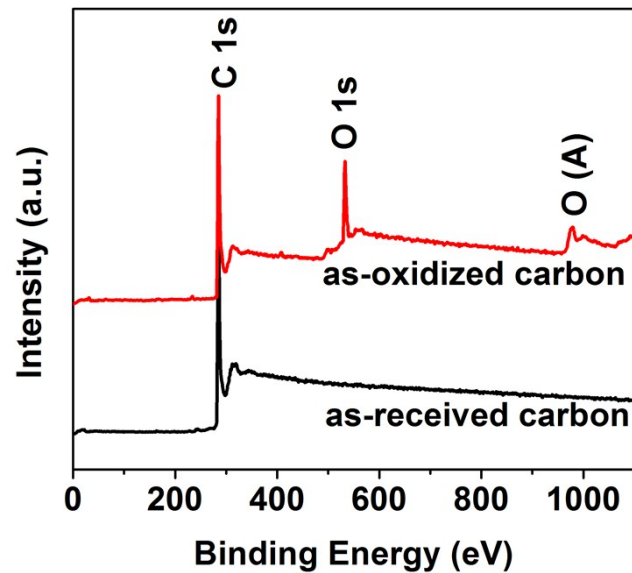

**Fig. S2.** The survey XPS spectra of as-received and as-oxidized carbon NPs. Both samples contain carbon and oxygen elements with a carbon/oxygen atomic ratio of 0.9/0.1 for as-received carbon and 0.7/0.3 for as-oxidized carbon, respectively.

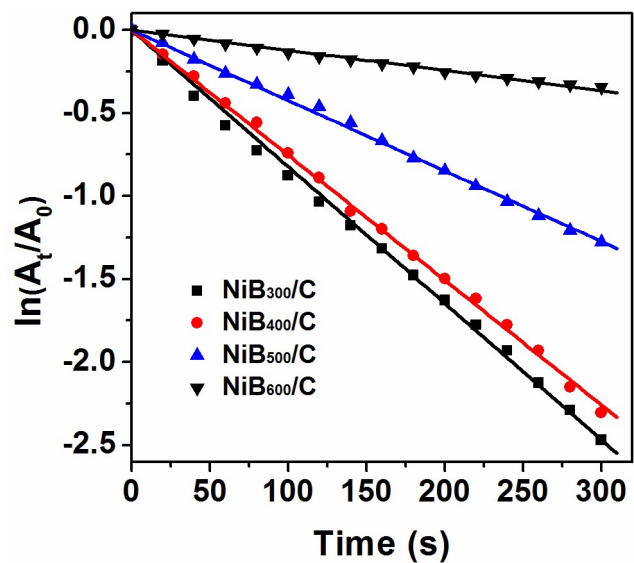

**Fig. S3.** The plots of  $\ln(A_t/A_0)$  versus reaction time for the 4-NP reduction over the crystalline NiB/C catalysts obtained by calcining the amorphous NiB/C at various temperatures.

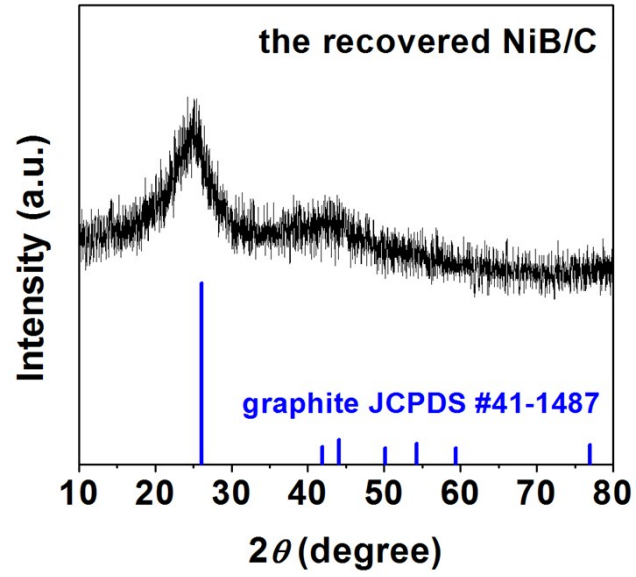

**Fig. S4.** The XRD pattern of NiB/C after five times of cycling uses, which shows that the NiB/C still shows diffractions belonging to graphite carbon. No phase change is observed after cycling uses.

**Table S1** Comparison of the normalized rate constants ( $k_n = k / m_{\text{metal}}$ ) of NiB/C with the prior catalysts reported for the 4-NP reduction with NaBH<sub>4</sub>.

| catalysts          |                     | $k_n^a$<br>(s <sup>-1</sup> ·mg <sup>-1</sup> ) | references |
|--------------------|---------------------|-------------------------------------------------|------------|
| active metals      | supports            |                                                 |            |
| Raney® Ni          | –                   | 0.0370                                          | 2          |
| NiPt NPs           | –                   | 0.5735                                          | 2          |
| crystalline Ni NPs | CB                  | 0.0452                                          | 3          |
| crystalline Ni NPs | SiO <sub>2</sub>    | 0.0910                                          | 4          |
| crystalline Ni NPs | rGO                 | 0.6093                                          | 5          |
| Au NPs             | GO/CNT              | 0.1136                                          | 6          |
| Au shell           | C nanofibers (core) | 0.2390                                          | 7          |
| Pd NPs             | rGO                 | 2.350                                           | 8          |
| amorphous NiB      | CB                  | 3.640                                           | this work  |

<sup>a</sup>  $k_n$  is the normalized reaction rate constant,  $k_n = k / m_{\text{metal}}$ .

## References

1. P. Serp, M. Corrias and P. Kalck, *Appl. Catal., A*, 2003, **253**, 337-358.
2. S. K. Ghosh, M. Mandal, S. Kundu, S. Nath and T. Pal, *Appl. Catal., A*, 2004, **268**, 61-66.
3. J. W. Xia, G. Y. He, L. L. Zhang, X. Q. Sun and X. Wang, *Appl. Catal., B*, 2016, **180**, 408-415.
4. S. Zhang, S. Gai, F. He, S. Ding, L. Li and P. Yang, *Nanoscale*, 2014, **6**, 11181-11188.
5. C.-C. Yeh and D.-H. Chen, *Appl. Catal., B*, 2014, **150**, 298-304.
6. F. Yang, C. Wang, L. Wang, C. Liu, A. Feng, X. Liu, C. Chi, X. Jia, L. Zhang and Y. Li, *RSC Adv.*, 2015, **5**, 37710-37715.
7. P. Zhang, C. Shao, X. Li, M. Zhang, X. Zhang, C. Su, N. Lu, K. Wang and Y. Liu, *PCCP*, 2013, **15**, 10453-10458.
8. Z. Wang, C. Xu, G. Gao and X. Li, *RSC Advances*, 2014, **4**, 13644-13651.
